# Supplementary material
Source: MDPI journal article supplement (https://www.mdpi.com/2312-7481/8/10/126)
Supplement: s1 [file s1 › magnetochemistry-1964477-supplementary.pdf]

# Supporting Information

## Slow Magnetic Relaxation in Neutral 0D and 1D Assemblies of a Mn(III) Schiff Base Complex and Heptacyanorhenate(IV)

Taisiya S. Sukhikh <sup>1</sup>, Wernsdorfer Wolfgang <sup>2</sup>, and Kira E. Vostrikova <sup>1,\*</sup>

<sup>1</sup> Nikolaev Institute of Inorganic Chemistry SB RAS, 3 Lavrentiev Avenue, 630090 Novosibirsk, Russia;

<sup>2</sup> Physikalisches Institut, Karlsruhe Institute of Technology, 1 Wolfgang-Gaede-Str., D-76131 Karlsruhe,

**Table S1.** SCXRD Experimental details

|                                                                                                                | <b>1</b>                                                                                                                                                                                                      | <b>2</b>                                                                                                                                                                                                   |
|----------------------------------------------------------------------------------------------------------------|---------------------------------------------------------------------------------------------------------------------------------------------------------------------------------------------------------------|------------------------------------------------------------------------------------------------------------------------------------------------------------------------------------------------------------|
| Chemical formula                                                                                               | C <sub>31</sub> H <sub>34</sub> MnN <sub>11</sub> O <sub>2</sub> Re·7H <sub>2</sub> O                                                                                                                         | C <sub>31</sub> H <sub>34</sub> MnN <sub>11</sub> O <sub>2</sub> Re·3H <sub>2</sub> O                                                                                                                      |
| <i>M<sub>w</sub></i>                                                                                           | 959.93                                                                                                                                                                                                        | 887.88                                                                                                                                                                                                     |
| Crystal system, space group                                                                                    | Monoclinic, <i>P</i> 2 <sub>1</sub> / <i>c</i>                                                                                                                                                                | Monoclinic, <i>P</i> 2 <sub>1</sub> / <i>n</i>                                                                                                                                                             |
| Temperature (K)                                                                                                | 150                                                                                                                                                                                                           | 150                                                                                                                                                                                                        |
| <i>a</i> , <i>b</i> , <i>c</i> (Å)                                                                             | 11.5292 (11)<br>17.9419 (14)<br>19.0885 (17)                                                                                                                                                                  | 12.3733(6)<br>22.9922 (11)<br>12.7619 (6)                                                                                                                                                                  |
| <i>α</i> , <i>β</i> , <i>γ</i> (°)                                                                             | 90<br>95.031 (3)<br>90                                                                                                                                                                                        | 90<br>93.070 (2)<br>90                                                                                                                                                                                     |
| <i>V</i> (Å <sup>3</sup> )                                                                                     | 3933.4 (6)                                                                                                                                                                                                    | 3625.4 (3)                                                                                                                                                                                                 |
| <i>Z</i>                                                                                                       | 4                                                                                                                                                                                                             | 4                                                                                                                                                                                                          |
| Radiation type                                                                                                 | Mo <i>Kα</i> , λ = 0.71073                                                                                                                                                                                    | Mo <i>Kα</i> , λ = 0.71073                                                                                                                                                                                 |
| μ (mm <sup>-1</sup> )                                                                                          | 3.46                                                                                                                                                                                                          | 3.74                                                                                                                                                                                                       |
| Crystal size (mm)                                                                                              | 0.18 × 0.13 × 0.1                                                                                                                                                                                             | 0.28 × 0.15 × 0.11                                                                                                                                                                                         |
| Diffractometer                                                                                                 | Bruker Apex DUO                                                                                                                                                                                               |                                                                                                                                                                                                            |
| <i>T<sub>min</sub></i> , <i>T<sub>max</sub></i>                                                                | 0.607, 0.745                                                                                                                                                                                                  | 0.596, 0.745                                                                                                                                                                                               |
| N <sup>o</sup> of measured, independent observed [ <i>I</i> > 2σ( <i>I</i> )] reflections                      | 43075, 7545, 5967                                                                                                                                                                                             | 53843, 6903, 6392                                                                                                                                                                                          |
| <i>R<sub>int</sub></i>                                                                                         | 0.028                                                                                                                                                                                                         | 0.019                                                                                                                                                                                                      |
| q values (°)                                                                                                   | θ <sub>max</sub> = 25.8, θ <sub>min</sub> = 1.6                                                                                                                                                               | θ <sub>max</sub> = 25.7, θ <sub>min</sub> = 2.4                                                                                                                                                            |
| Range of <i>h</i> , <i>k</i> , <i>l</i>                                                                        | -14 ≤ <i>h</i> ≤ 14<br>-21 ≤ <i>k</i> ≤ 21<br>-23 ≤ <i>l</i> ≤ 23                                                                                                                                             | -15 ≤ <i>h</i> ≤ 15<br>-28 ≤ <i>k</i> ≤ 28<br>-15 ≤ <i>l</i> ≤ 15                                                                                                                                          |
| <i>R</i> [ <i>F</i> <sup>2</sup> > 2σ( <i>F</i> <sup>2</sup> )], <i>wR</i> ( <i>F</i> <sup>2</sup> ), <i>S</i> | 0.040, 0.111, 1.07                                                                                                                                                                                            | 0.040, 0.111, 1.07                                                                                                                                                                                         |
| No. of reflections, parameters, restraints                                                                     | 7545, 484, 0                                                                                                                                                                                                  | 6903, 455, 1                                                                                                                                                                                               |
| H-atom treatment                                                                                               | H-atom parameters constrained                                                                                                                                                                                 | H-atom parameters constrained                                                                                                                                                                              |
| Weighting scheme                                                                                               | w=1/[σ <sup>2</sup> ( <i>F<sub>o</sub></i> <sup>2</sup> )+(0.049 <i>P</i> ) <sup>2</sup> +19.910 <i>P</i> ]<br>where <i>P</i> = ( <i>F<sub>o</sub></i> <sup>2</sup> + 2 <i>F<sub>c</sub></i> <sup>2</sup> )/3 | w=1/[σ <sup>2</sup> ( <i>F<sub>o</sub></i> <sup>2</sup> )+(0.015 <i>P</i> ) <sup>2</sup> +5.297 <i>P</i> ]<br>where <i>P</i> =( <i>F<sub>o</sub></i> <sup>2</sup> +2 <i>F<sub>c</sub></i> <sup>2</sup> )/3 |
| Δρ <sub>max</sub> , Δρ <sub>min</sub> (e Å <sup>-3</sup> )                                                     | 3.88, -0.71                                                                                                                                                                                                   | 0.86, -0.53                                                                                                                                                                                                |

Absorption corrections were applied with the use of the SADABS program [APEX2 (Version 2.0), SAINT (Version 8.18c), and SADABS (Version 2.11), Bruker Advanced X-ray Solutions, Bruker AXS Inc., Madison, Wisconsin, USA, 2000–2012.]. The crystal structure was solved by direct methods and refined by full-matrix least squares techniques with the use of the SHELXTL package [Sheldrick, G.M. (2015). *Acta Cryst. C* 71, 3–8]. Computer programs: *APEX3* (Bruker-AXS, 2016), *SAINT* (Bruker-AXS, 2016), *SHELXT* 2014/5 (Sheldrick, 2014), *SHELXL* 2017/1 (Sheldrick, 2017). Atomic thermal displacement parameters for non-hydrogen atoms were refined anisotropically. The positions of hydrogen atoms were calculated corresponding to their geometrical conditions and refined using the riding model.

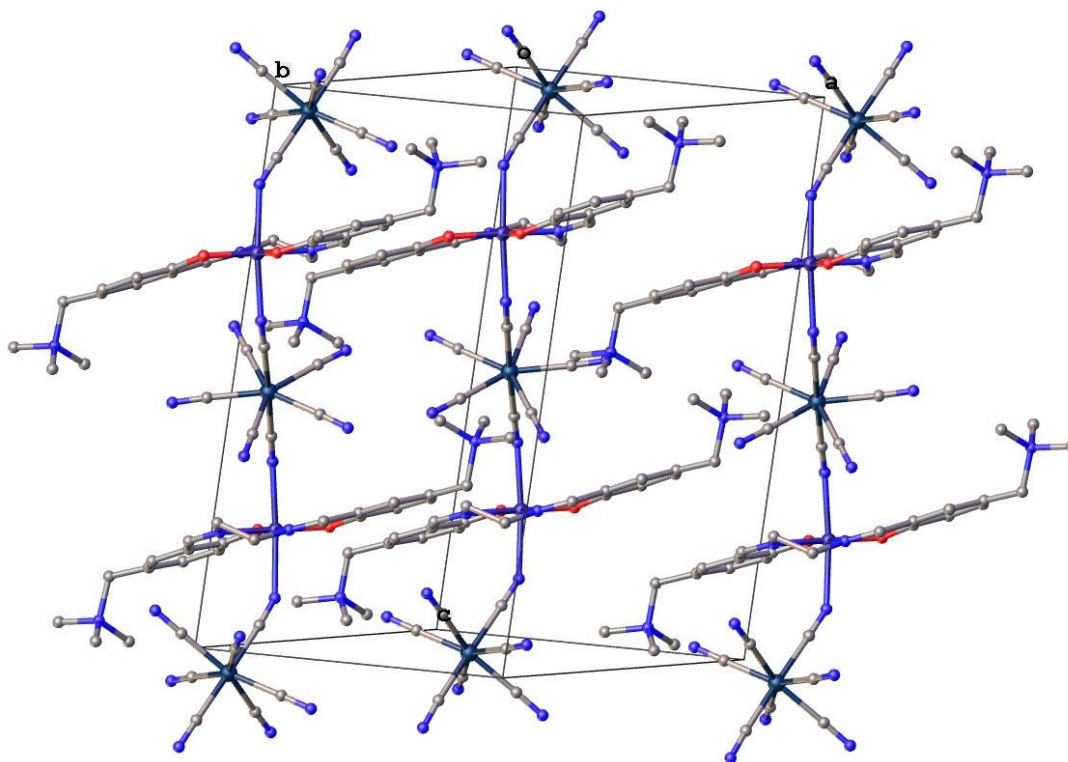

**Figure S1.** A view of chains packing in a crystal of **1** demonstrating a trans-location of the  $[\text{Me}_3\text{N}^+\text{CH}_2]$  substituents relative to a  $\text{SB}^{2+}$  plane. Hydrogen atoms are omitted for clarity.

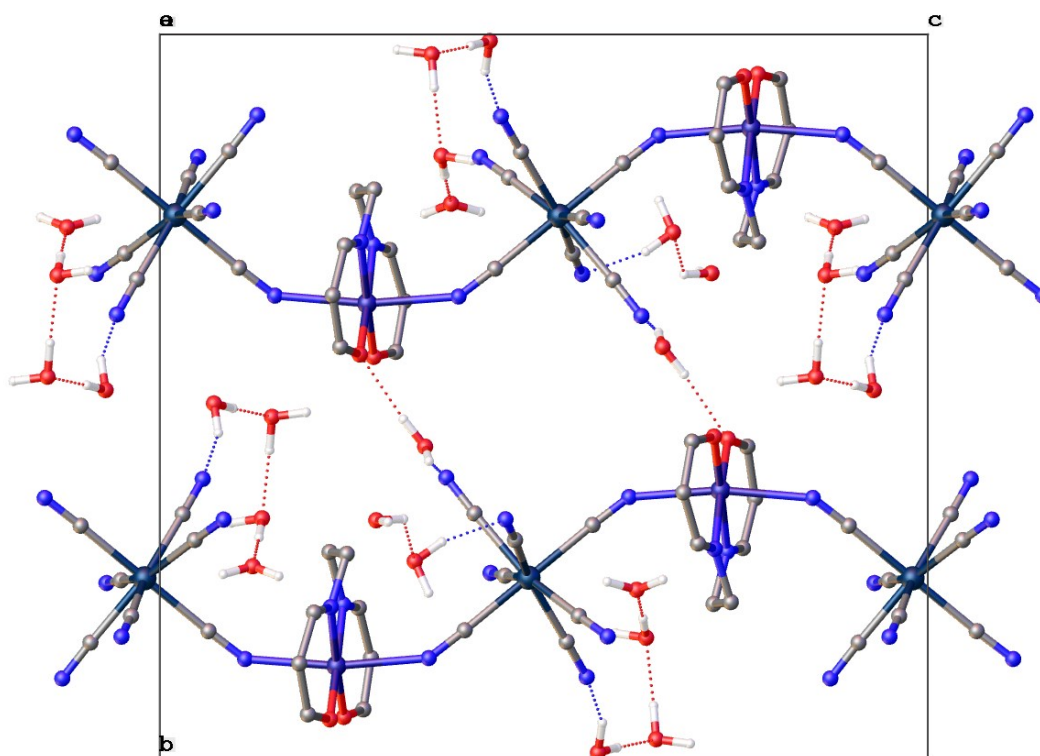

**Figure S2.** A layer formation in a crystal of **1**:  $\text{H}_2\text{O}$  molecules bind the fragments  $[\text{Mn}^{\text{III}}(\text{SB}^{2+})]^{3+}$  and  $[\text{Re}(\text{CN})_7]^{3-}$  belonging to the different chains. The layers are interconnecting by means of interstitial water molecules. The  $\text{SB}^{2+}$ -ligands are reduced for clarity.

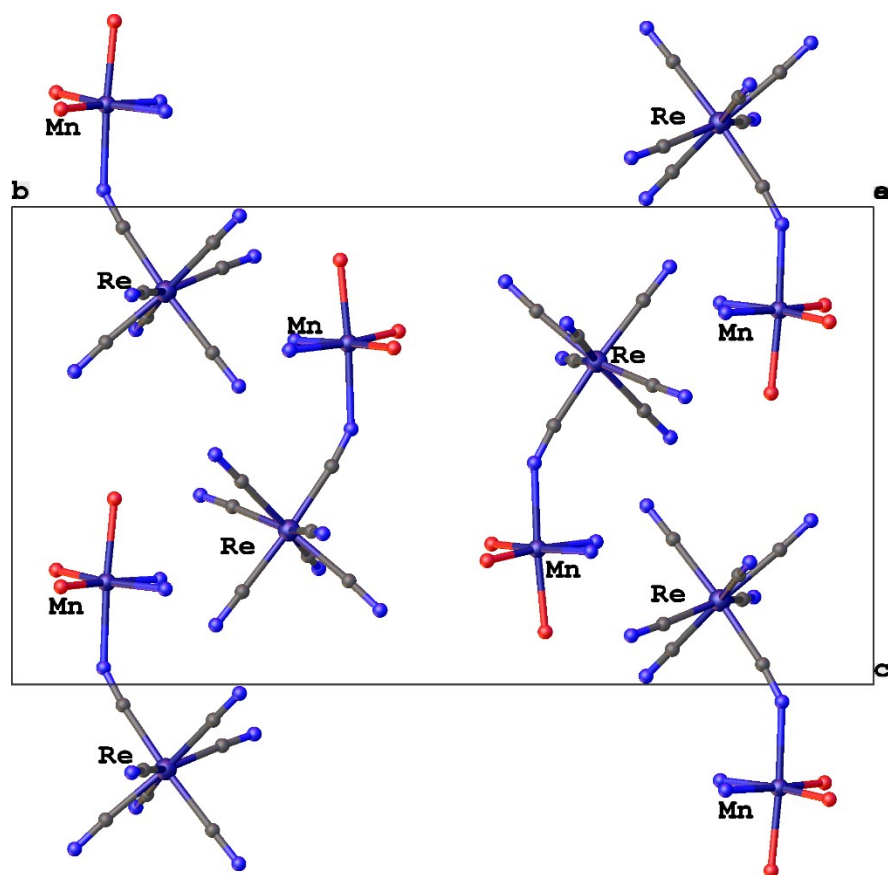

**Figure S3.** A view of dimers packing in a crystal of **2**. The  $\text{SB}^{2+}$ -ligands are reduced, and hydrogen atoms are omitted for clarity.

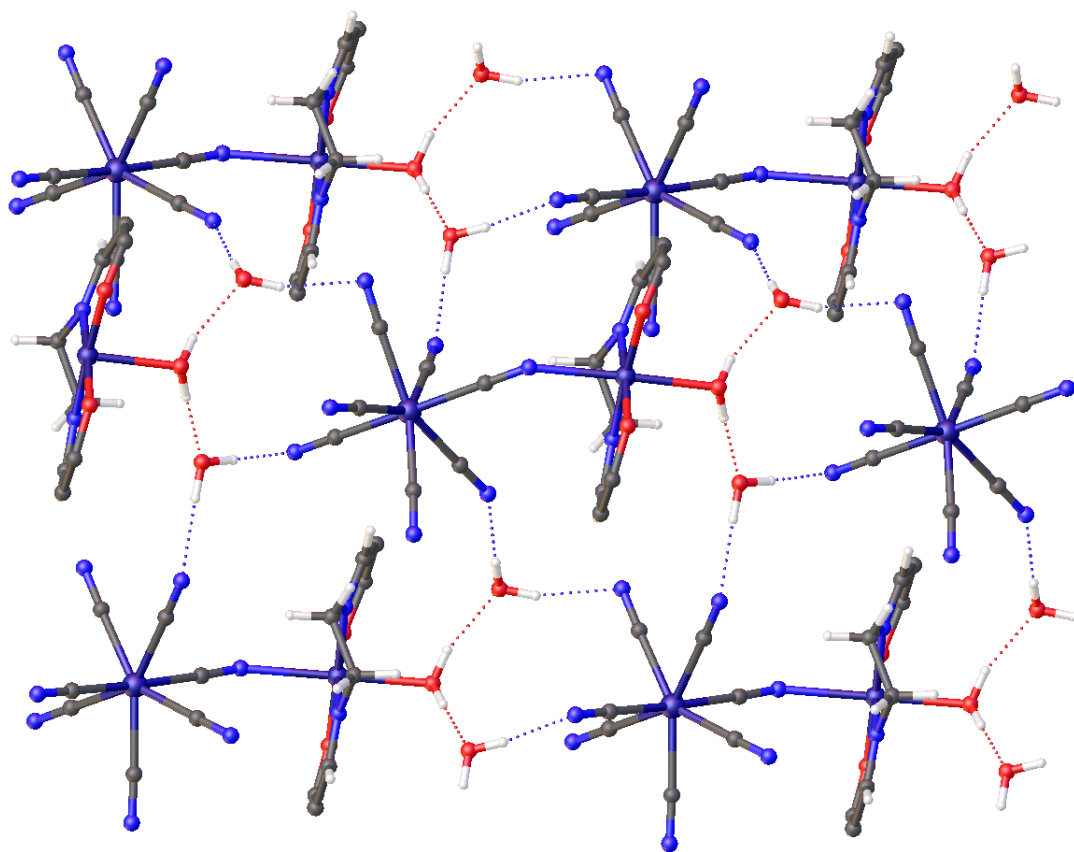

**Figure S4.** A layer formation in a crystal of **2**:  $\text{H}_2\text{O}$  molecules bind the fragments  $[\text{Mn}^{\text{III}}(\text{SB}^{2+})]^{3+}$  and  $[\text{Re}(\text{CN})_7]^{3-}$  belonging to the different chains. The layers are interconnecting by means of interstitial water molecules. The hydrogen atoms are partially omitted for clarity.

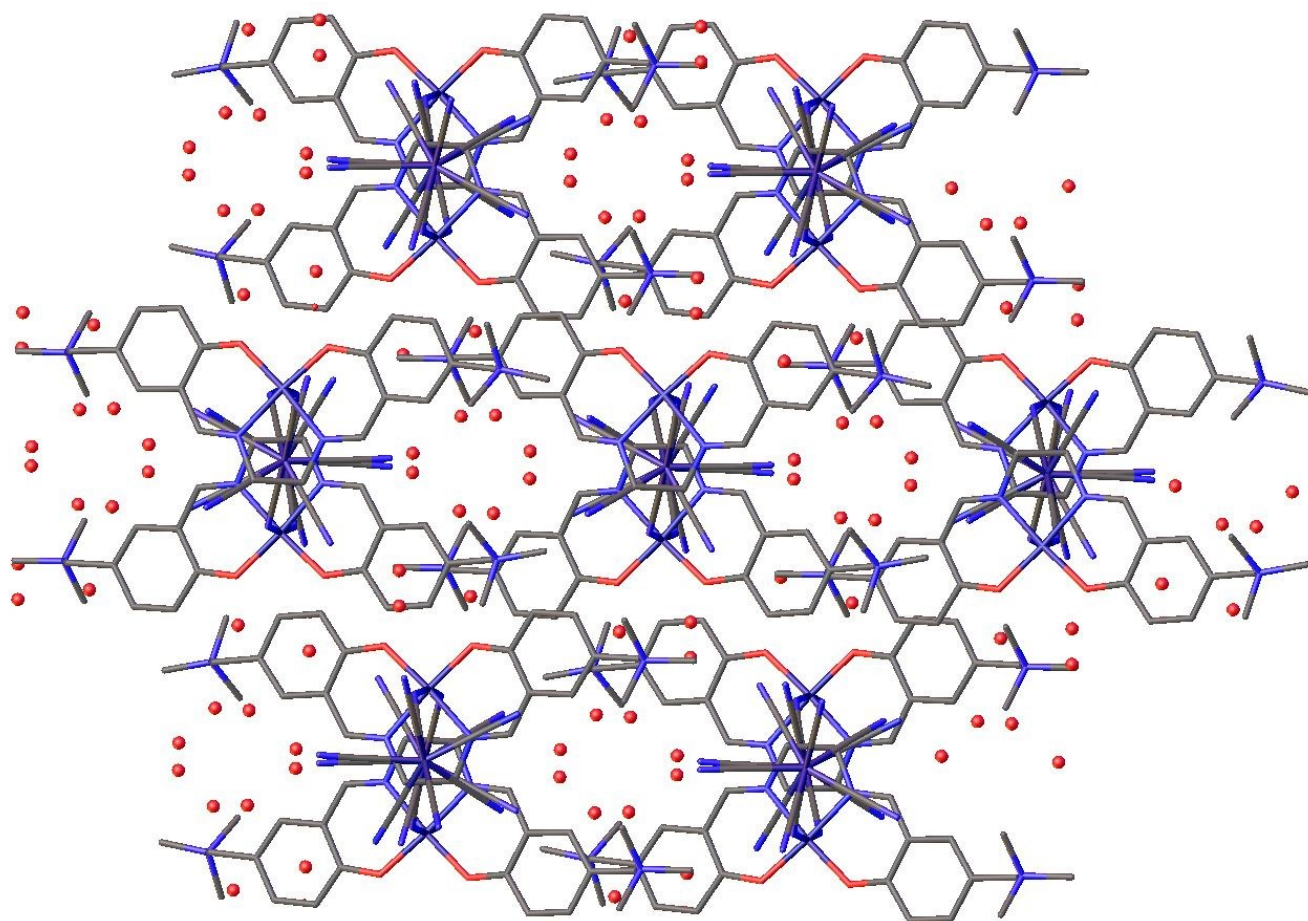

(a)

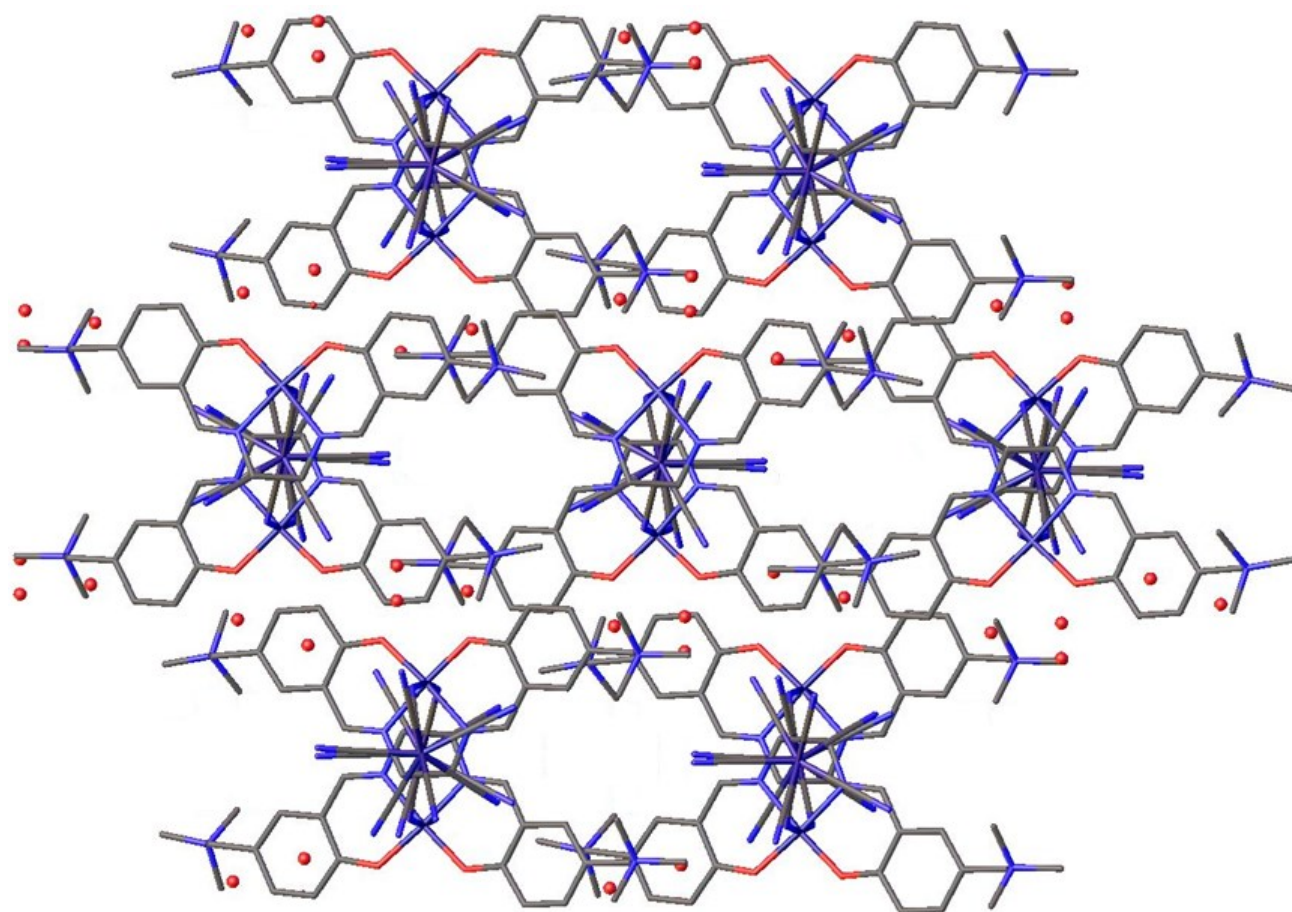

(b)

**Figure S5.** A view (in c-axis direction) of channels in a crystal of **1**: (a) filled by water molecules, (b) empty.

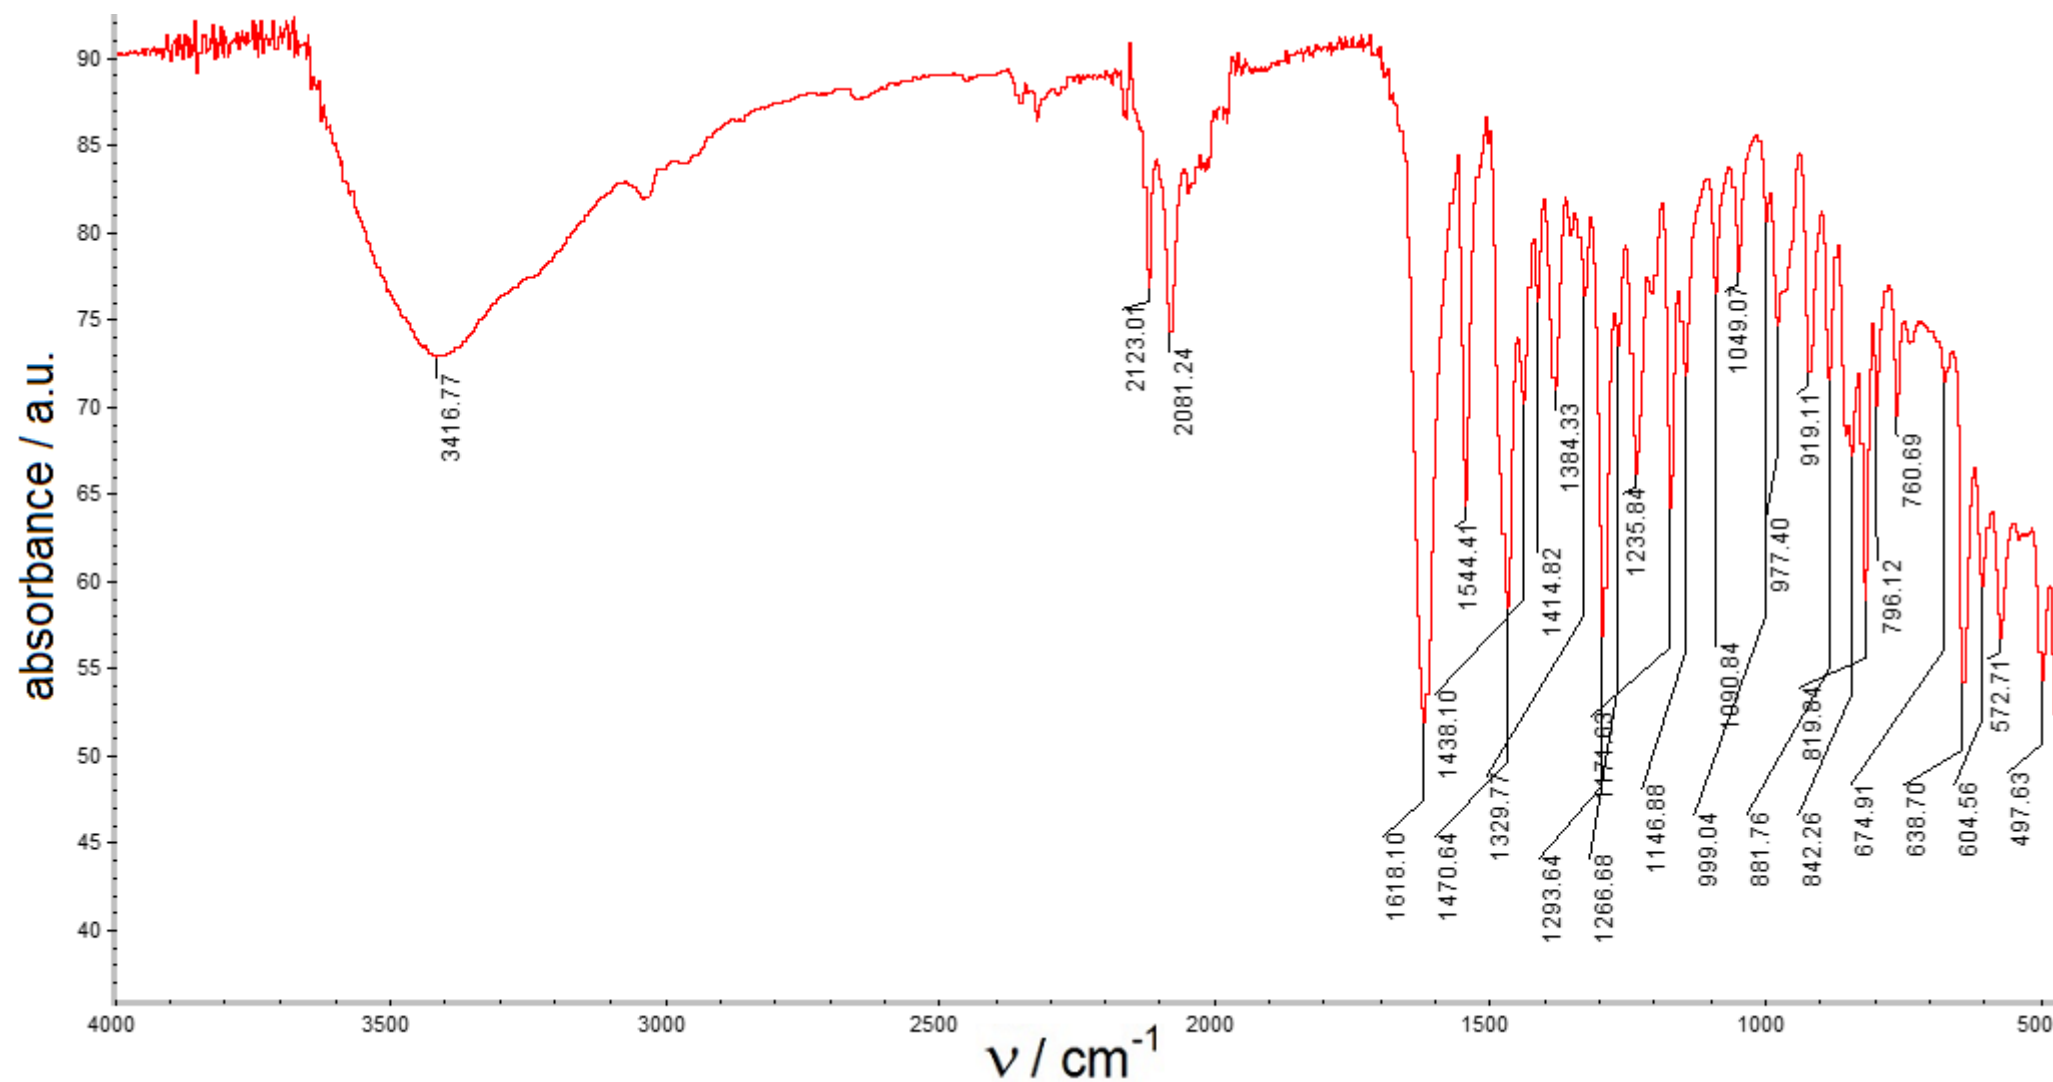

**Figure S6.** ATR-IR spectrum for  $\{[\text{Mn}(\text{SB}^{2+})\text{Re}(\text{CN})_7](\text{H}_2\text{O})_7\}_n$  **1**.

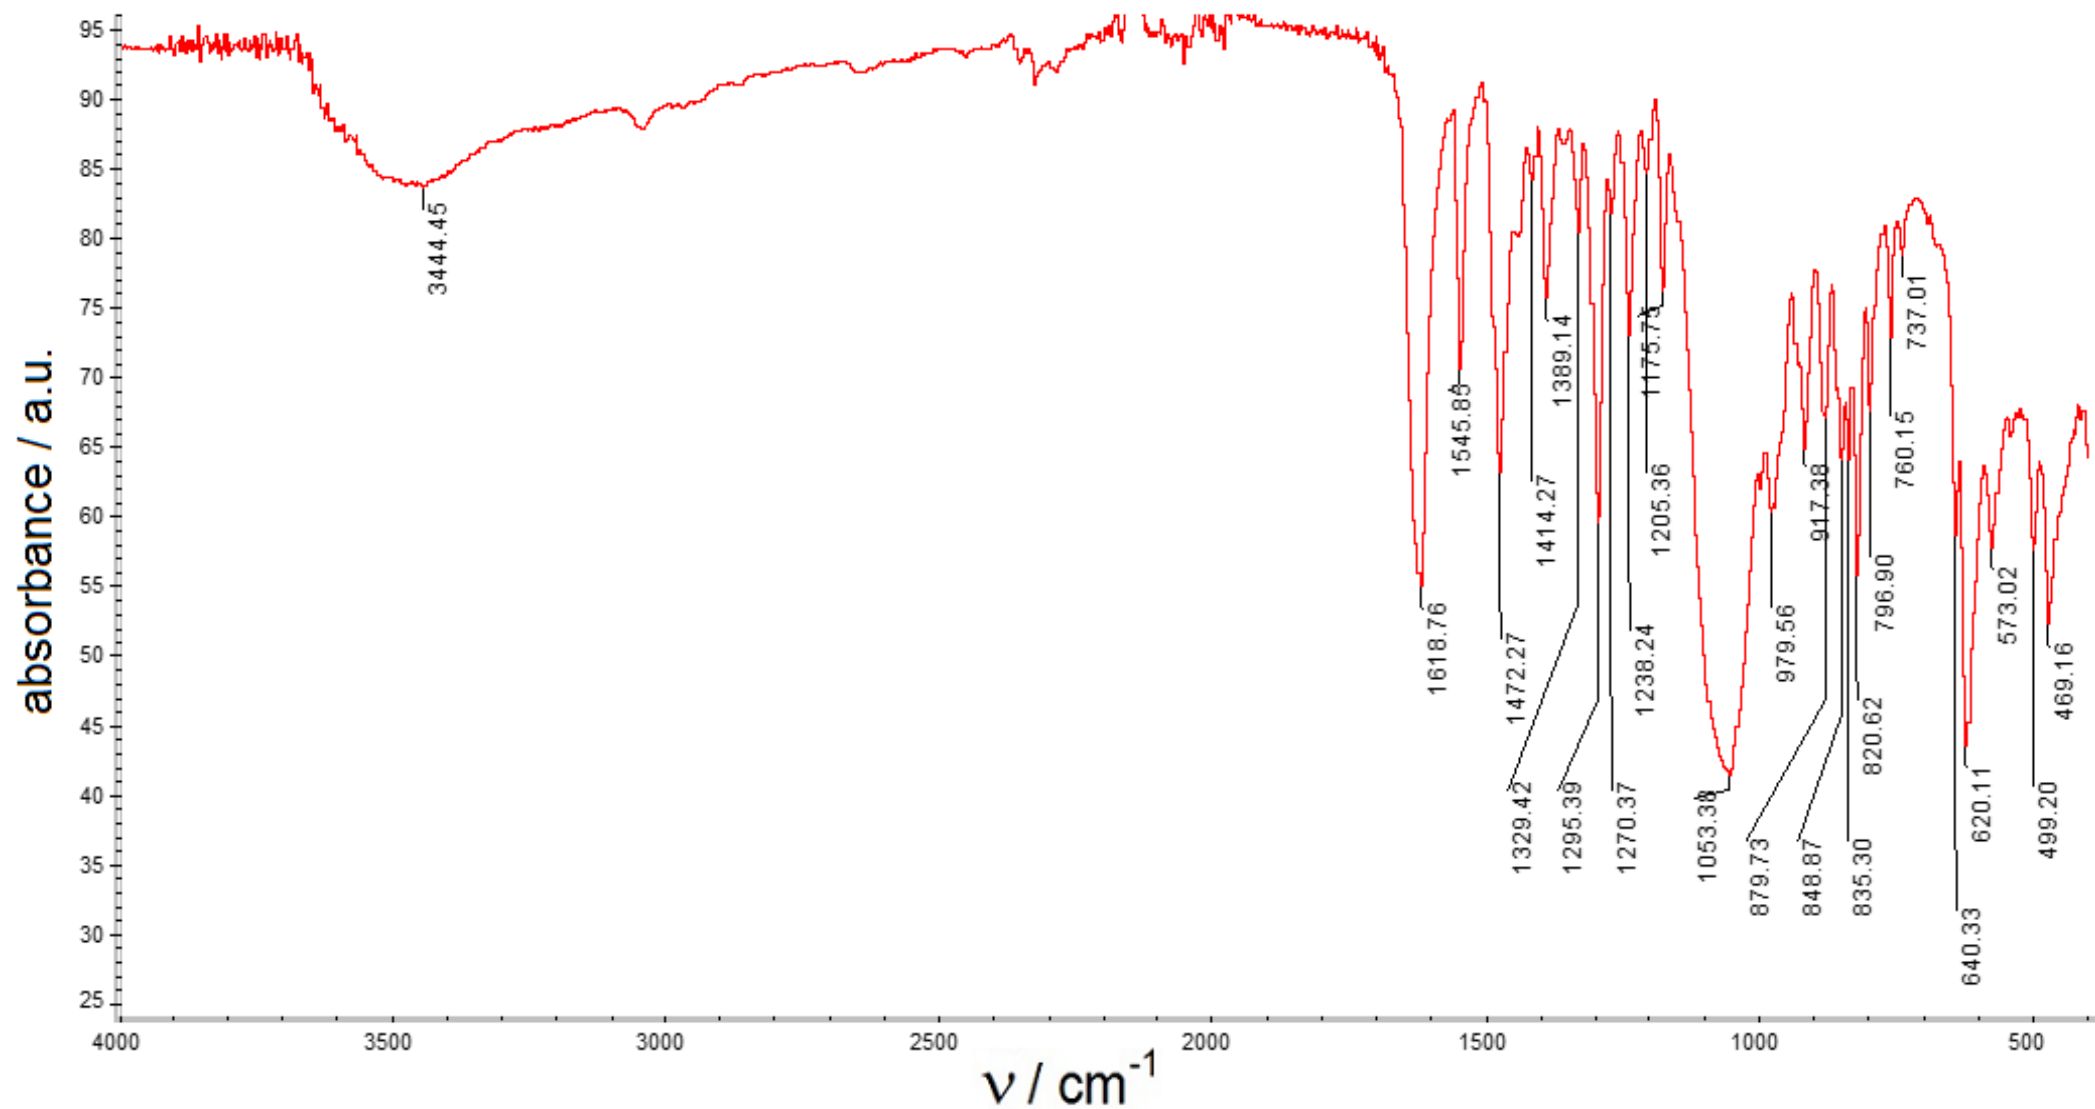

**Figure S7.** ATR-IR spectrum for the precursor,  $[\text{Mn}(\text{SB}^{2+})(\text{H}_2\text{O})_2](\text{ClO}_4)_3 \cdot \text{H}_2\text{O}$ .

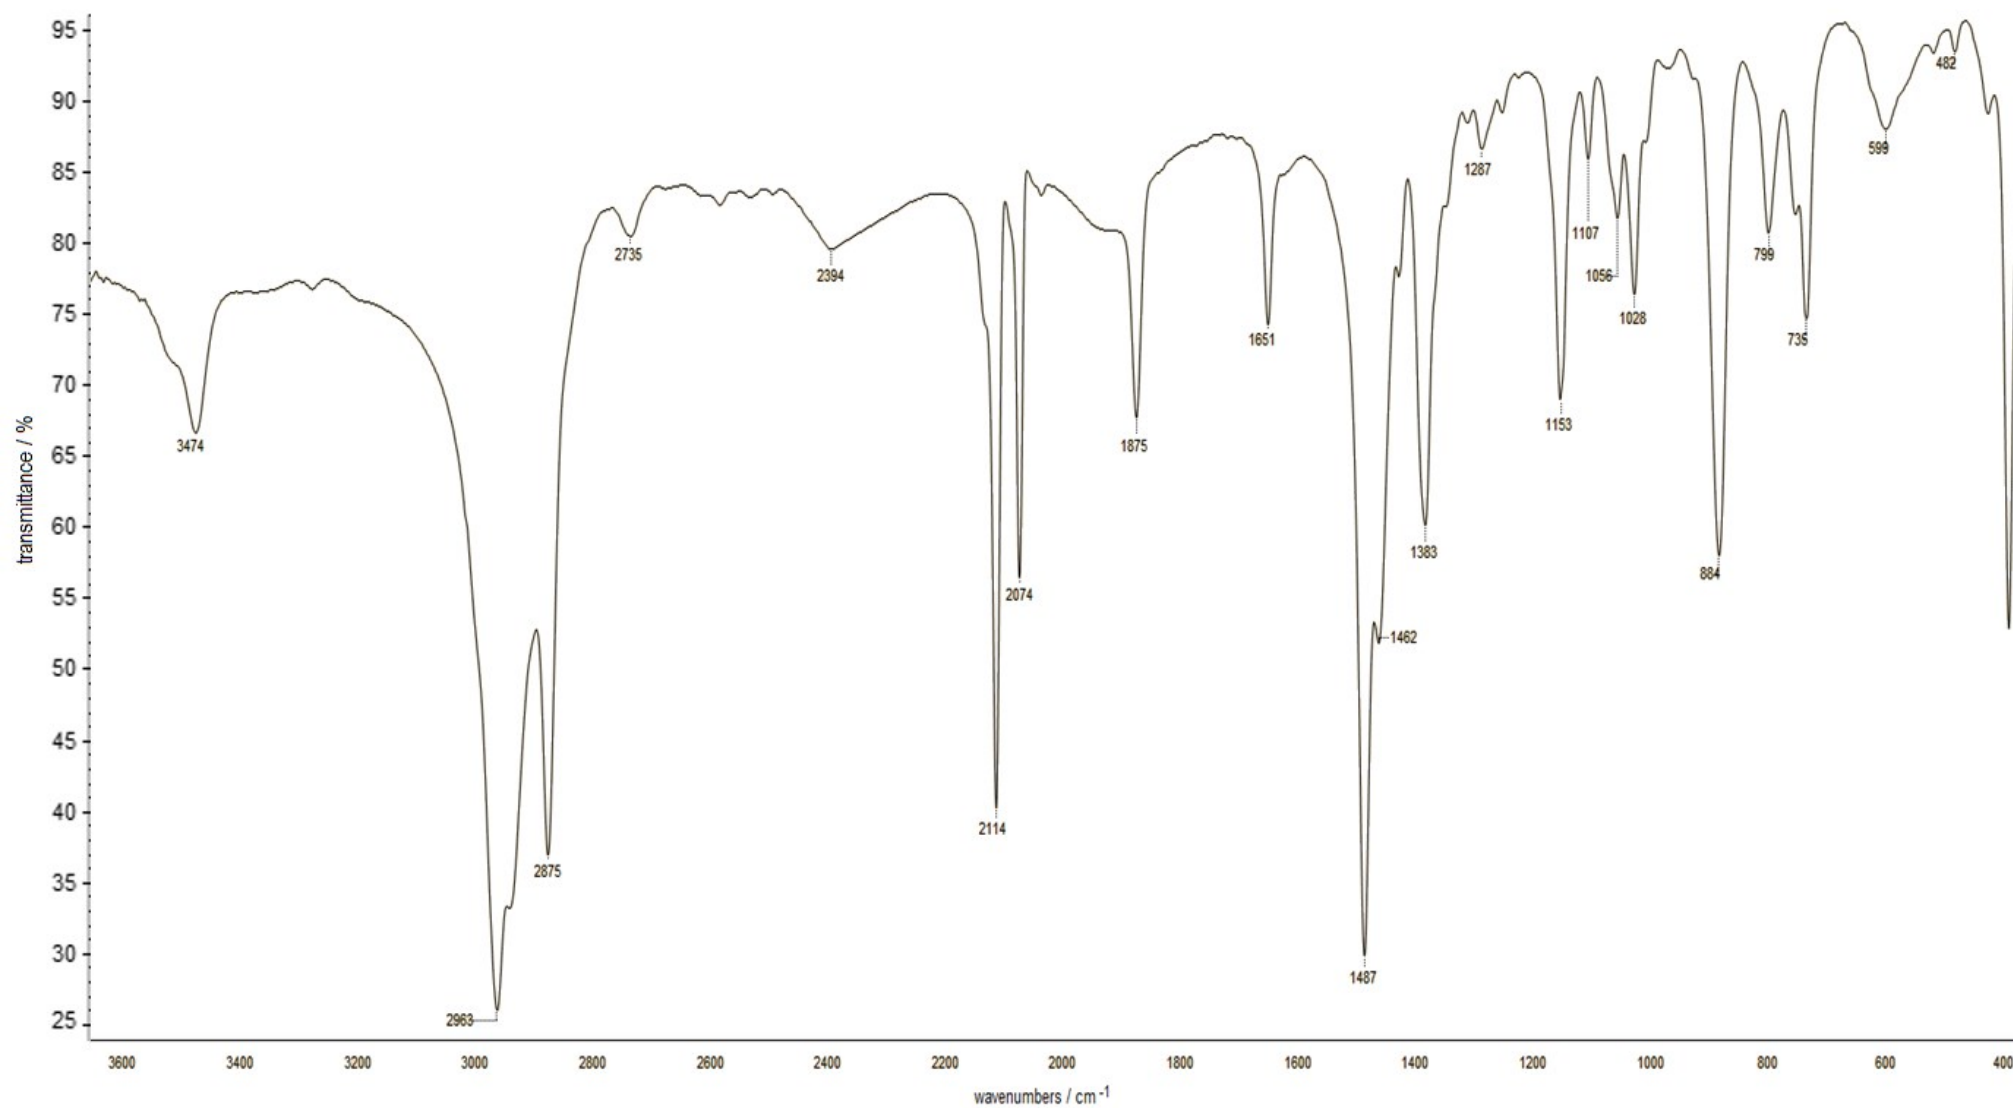

**Figure S8.** IR spectrum for the precursor,  $(\text{Bu}_4\text{N})_3[\text{Re}(\text{CN})_7] \cdot \text{H}_2\text{O}$  (KBr).

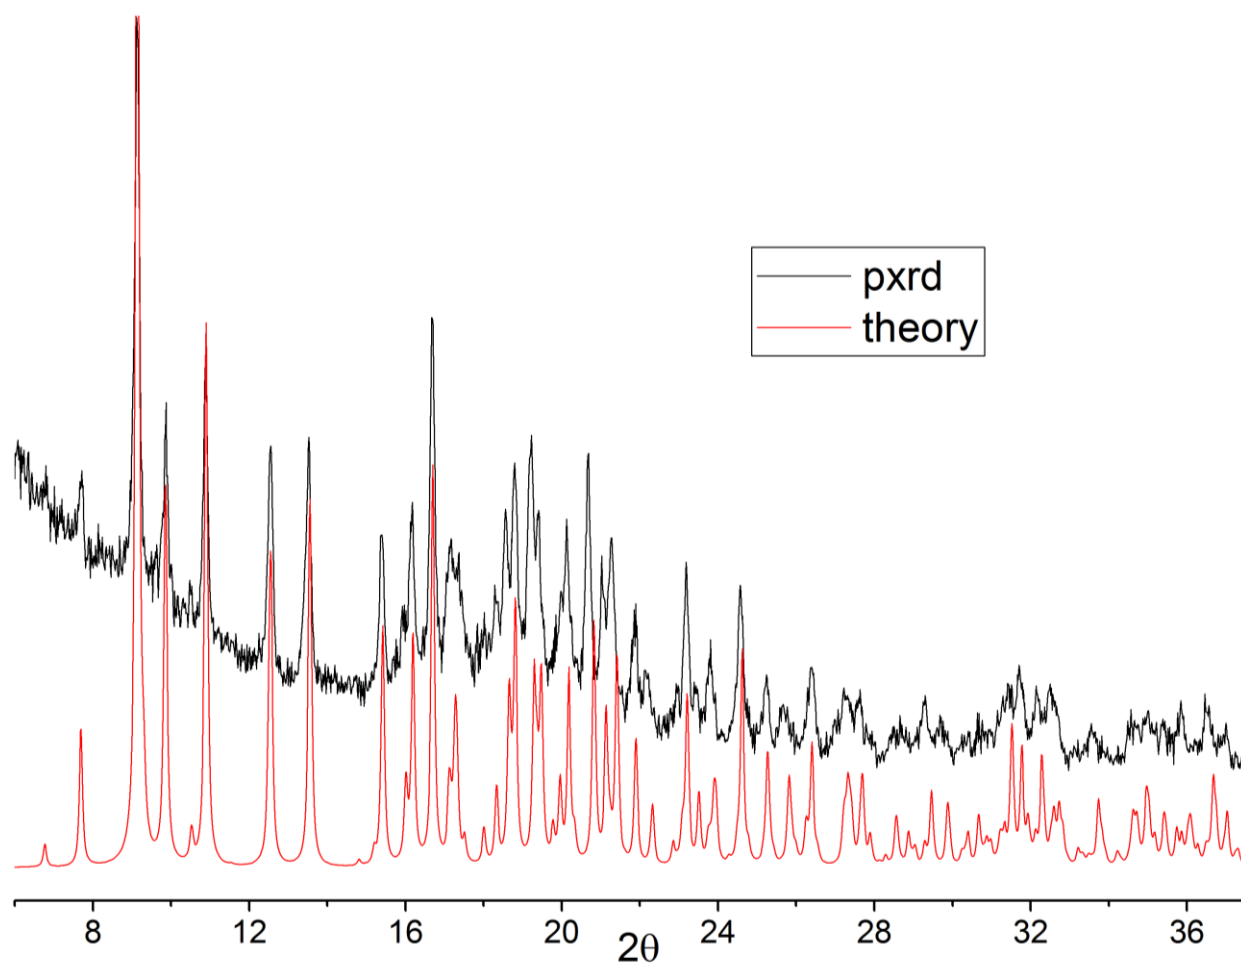

**Figure S9.** PXRD patterns for the chain compound **1**: polycrystalline sample (black), theoretically calculated (red).

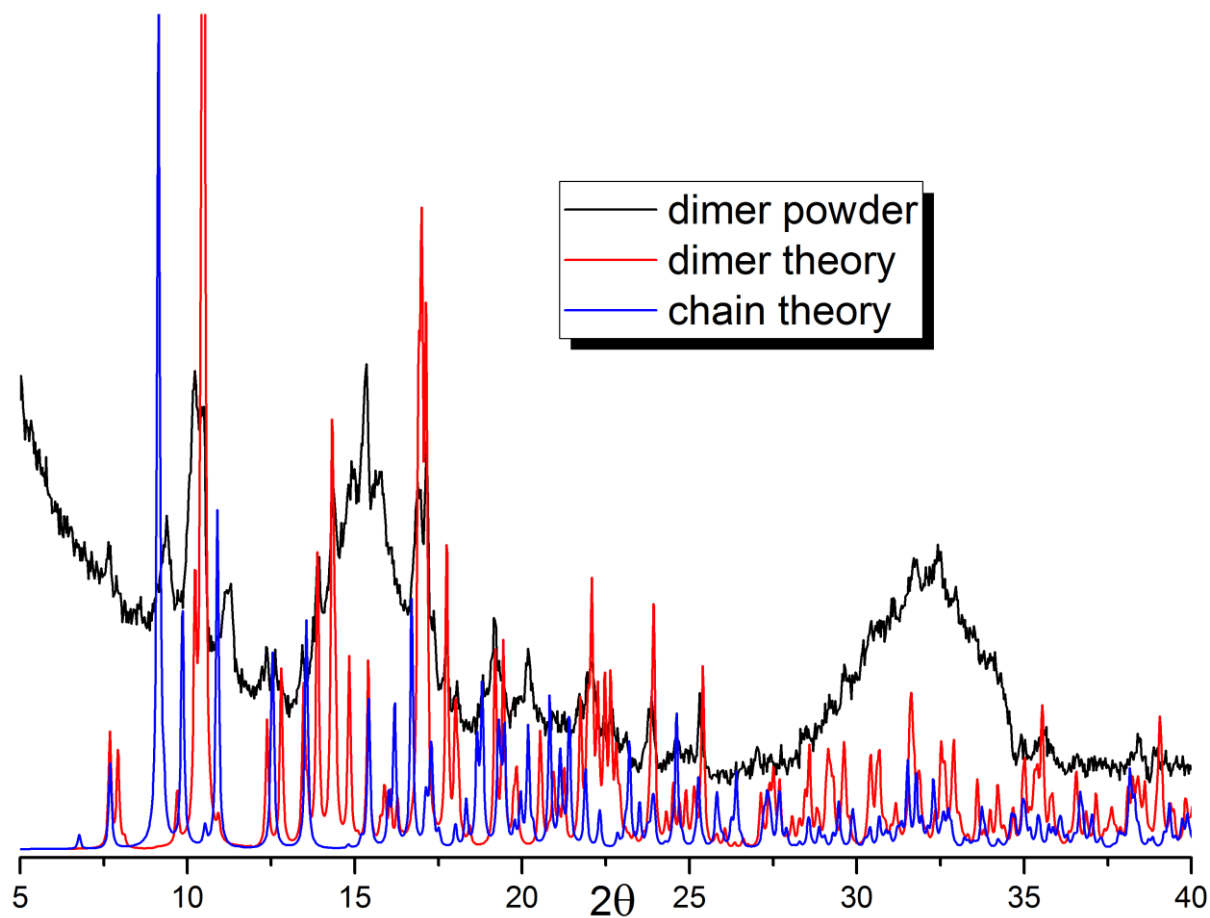

**Figure S10.** PXRD patterns for the dimer compound **2** (room T) and theoretically calculated (150 K) for **1** and **2**.

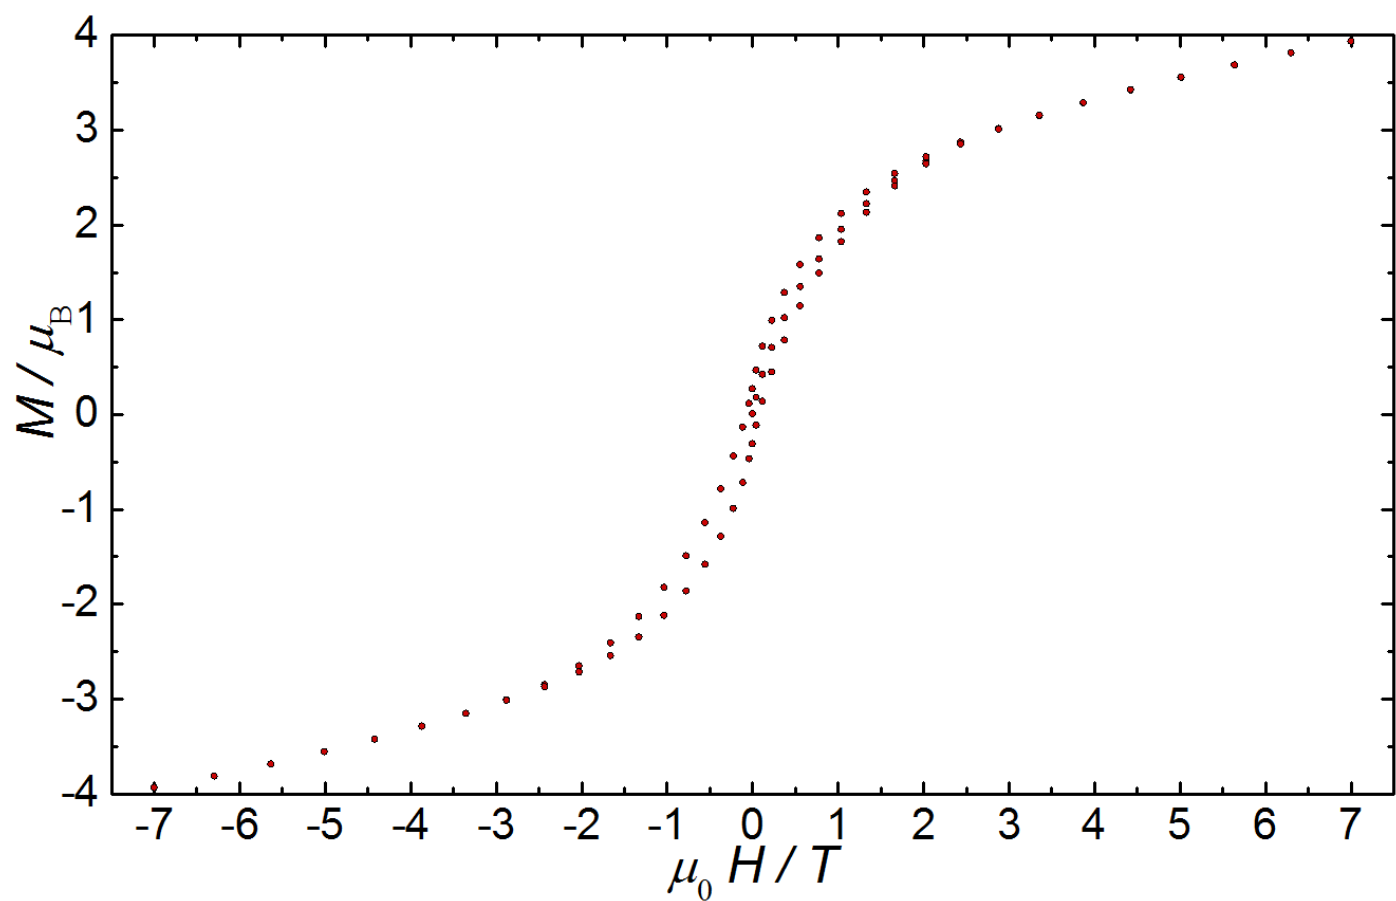

**Figure S11.** Magnetic hysteresis loop of **2** measured at 1.8 K on a polycrystalline sample (sw. rate – 0.07 T·s<sup>-1</sup>).

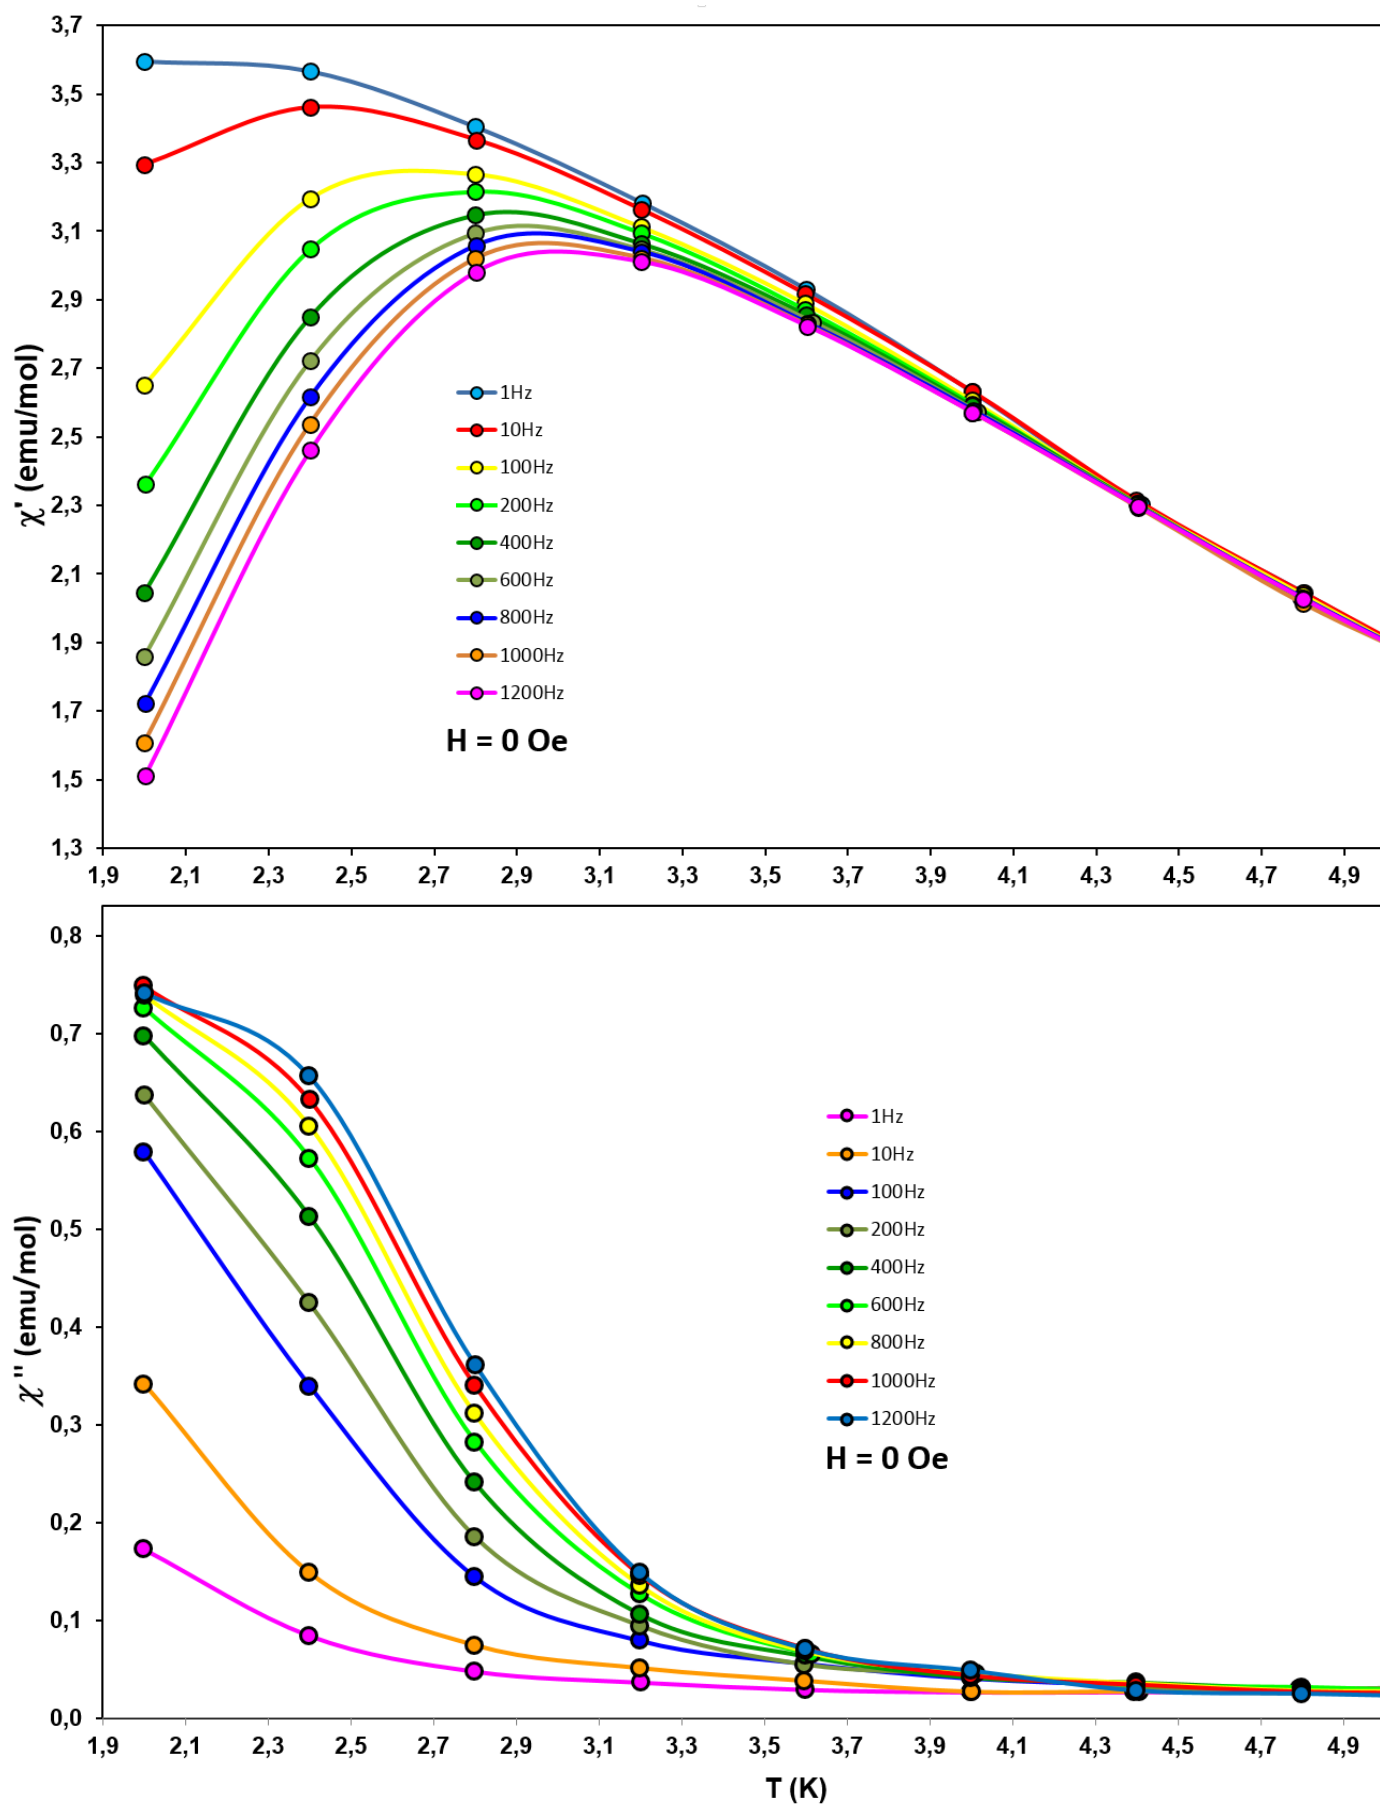

**Figure S12. 8.** Variable-temperature of the real,  $\chi'$  (top), and imaginary,  $\chi''$  (bottom), parts *ac* molar susceptibility data for **1** under  $H_{dc} = 0 \text{ Oe}$ ,  $H_{ac} = 2.7 \text{ Oe}$ . Solid lines are guides.

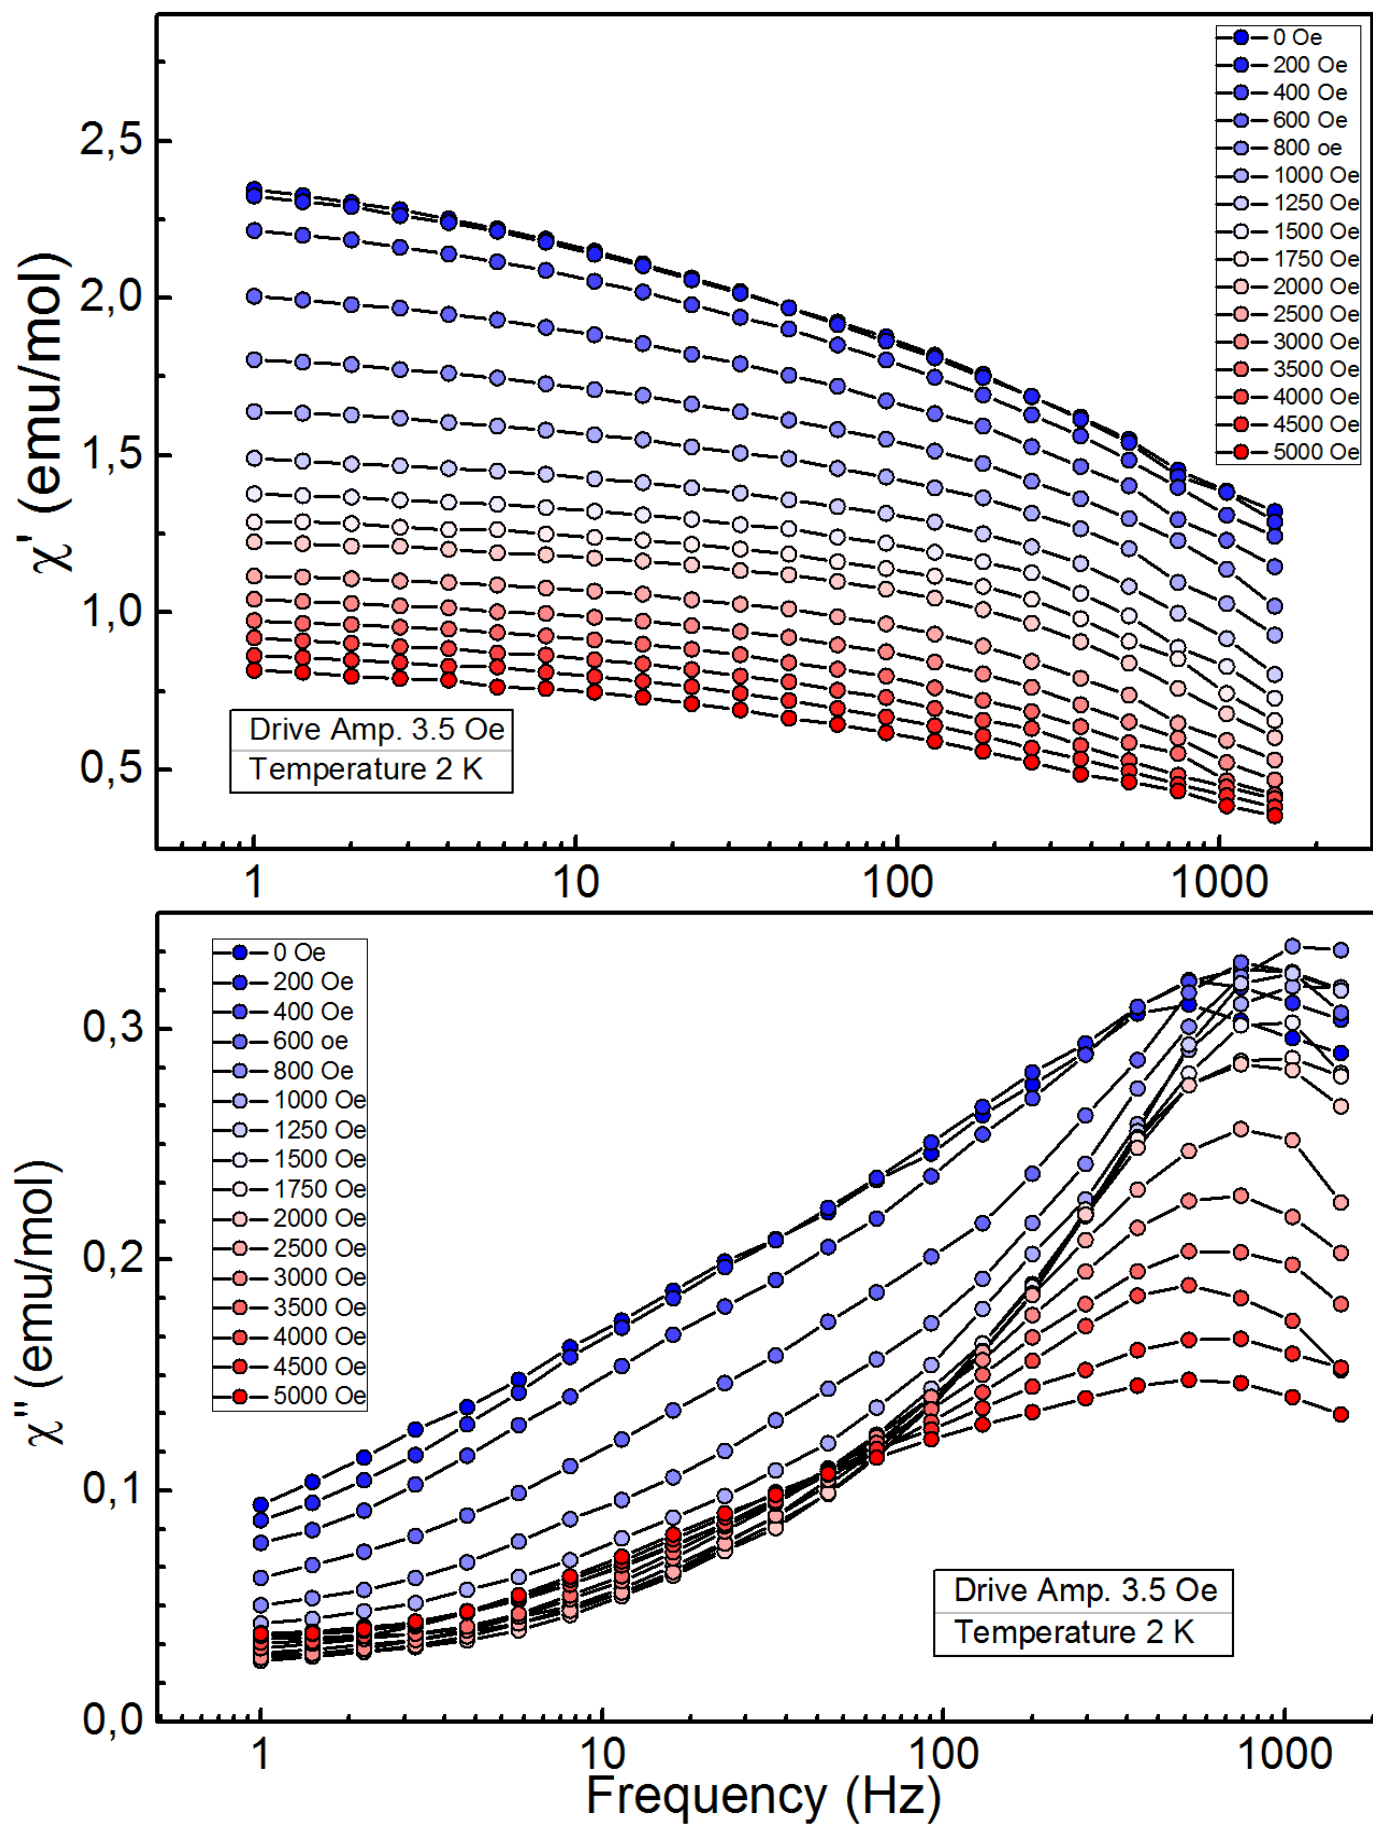

**Figure S13.** Frequency dependence of the real ( $\chi'$ ) (top) and imaginary ( $\chi''$ ) (bottom) parts of the  $ac$  susceptibility for a polycrystalline sample of **2** in different  $dc$ -fields and with applied a 3 Oe  $ac$  field. Solid lines are guides.

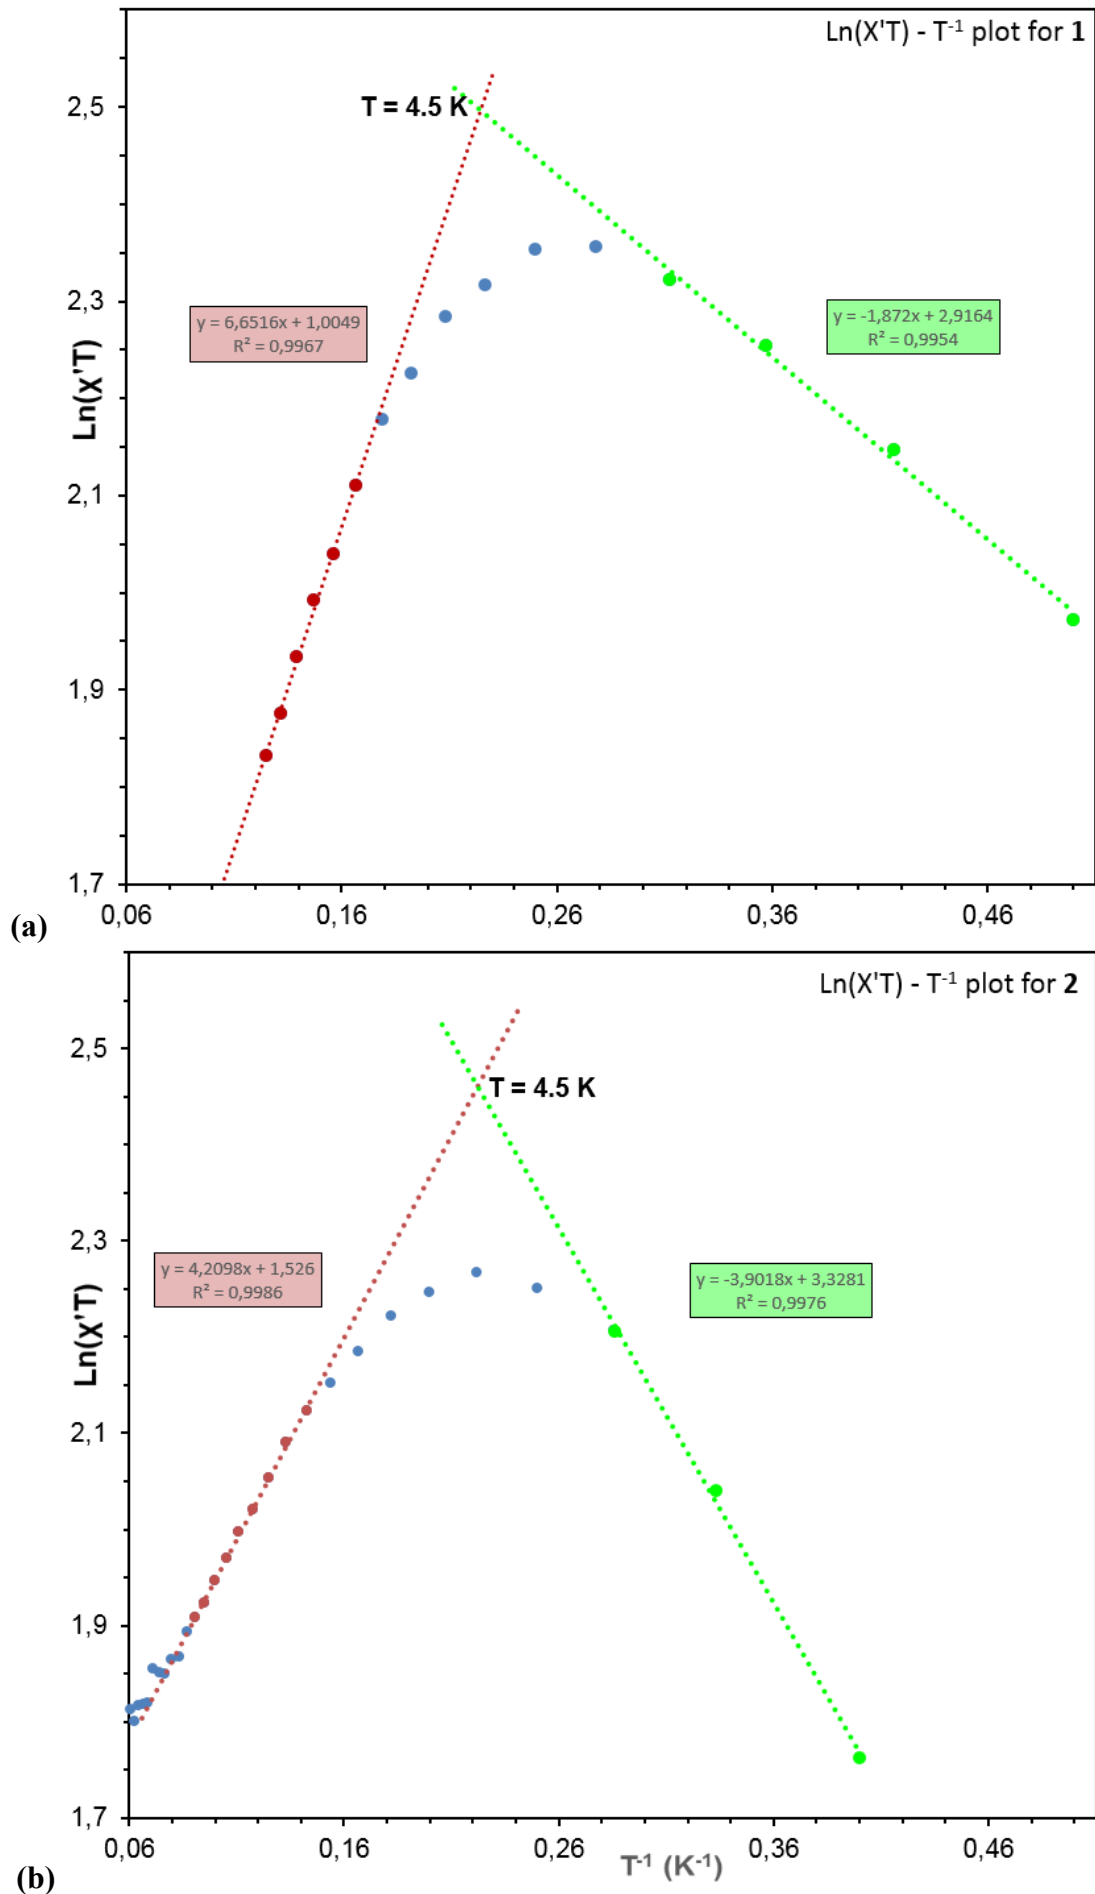

**Figure S14.** Plots of  $\ln(X'T)$  vs  $1/T$  (where  $X'$  is the molar component of the  $ac$  susceptibility) for **1** (top) and **2** (bottom) collected in zero applied  $dc$  field and frequency of 1 Hz. The dashed red lines correspond to a linear fit for high temperature region, giving  $\Delta\xi/k_B = 6.66$  ( $C_{eff}=1.005$  emu·K/mol) and 4.21 K ( $C_{eff}=1.526$  emu·K/mol) for **1** and **2** respectively. The dashed green lines corresponds to a linear fit for low temperature region. An intersection of the two linear regions corresponds to the crossover temperature  $T^*\approx 4.5$  K equal for both.

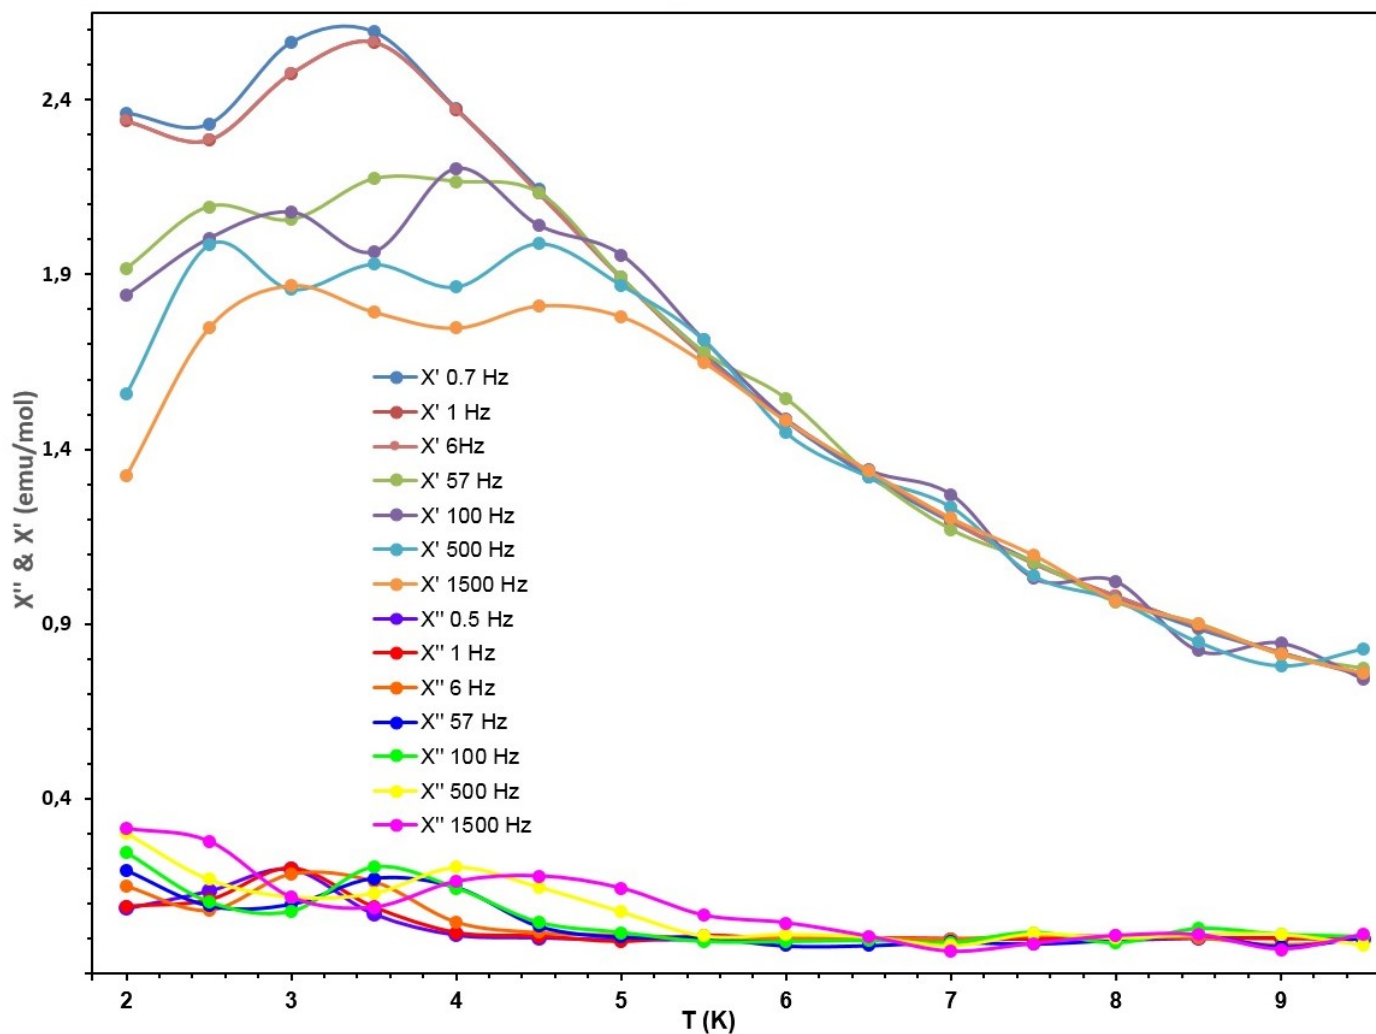

**Figure S15.** Variable-temperature real,  $\chi'$  (top) and imaginary,  $\chi''$  (bottom) *ac* molar susceptibility data for **2** under  $H_{dc}=100$  Oe,  $H_{ac}=3.5$  Oe. Solid lines are guides.

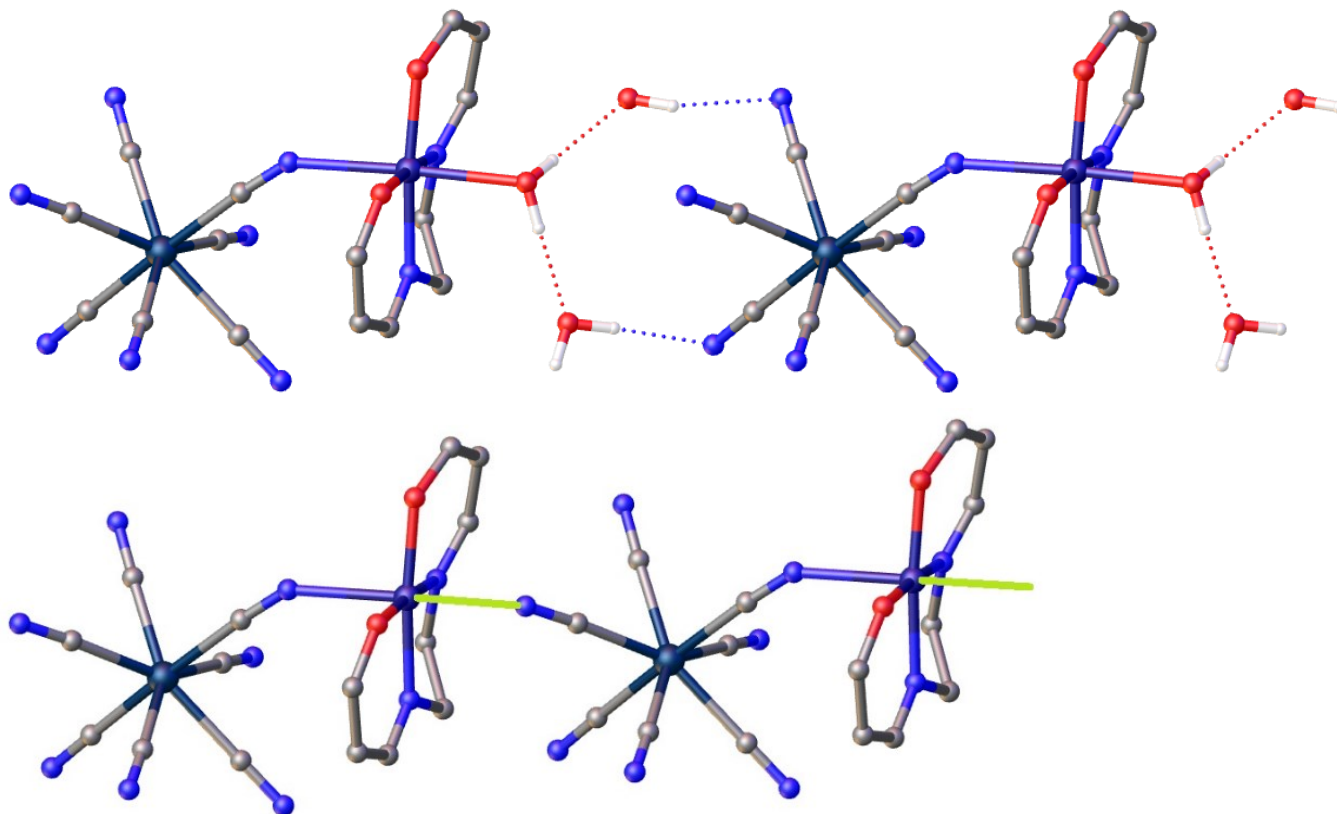

**Figure S16.** Possible formation of a 1D polymer from **2** by a desolvation. The  $[Mn(SB^{2+})]^{3+}$  complexes are connected to the  $Re^{IV}$  ions by an equatorial and an apical cyanide bridges.

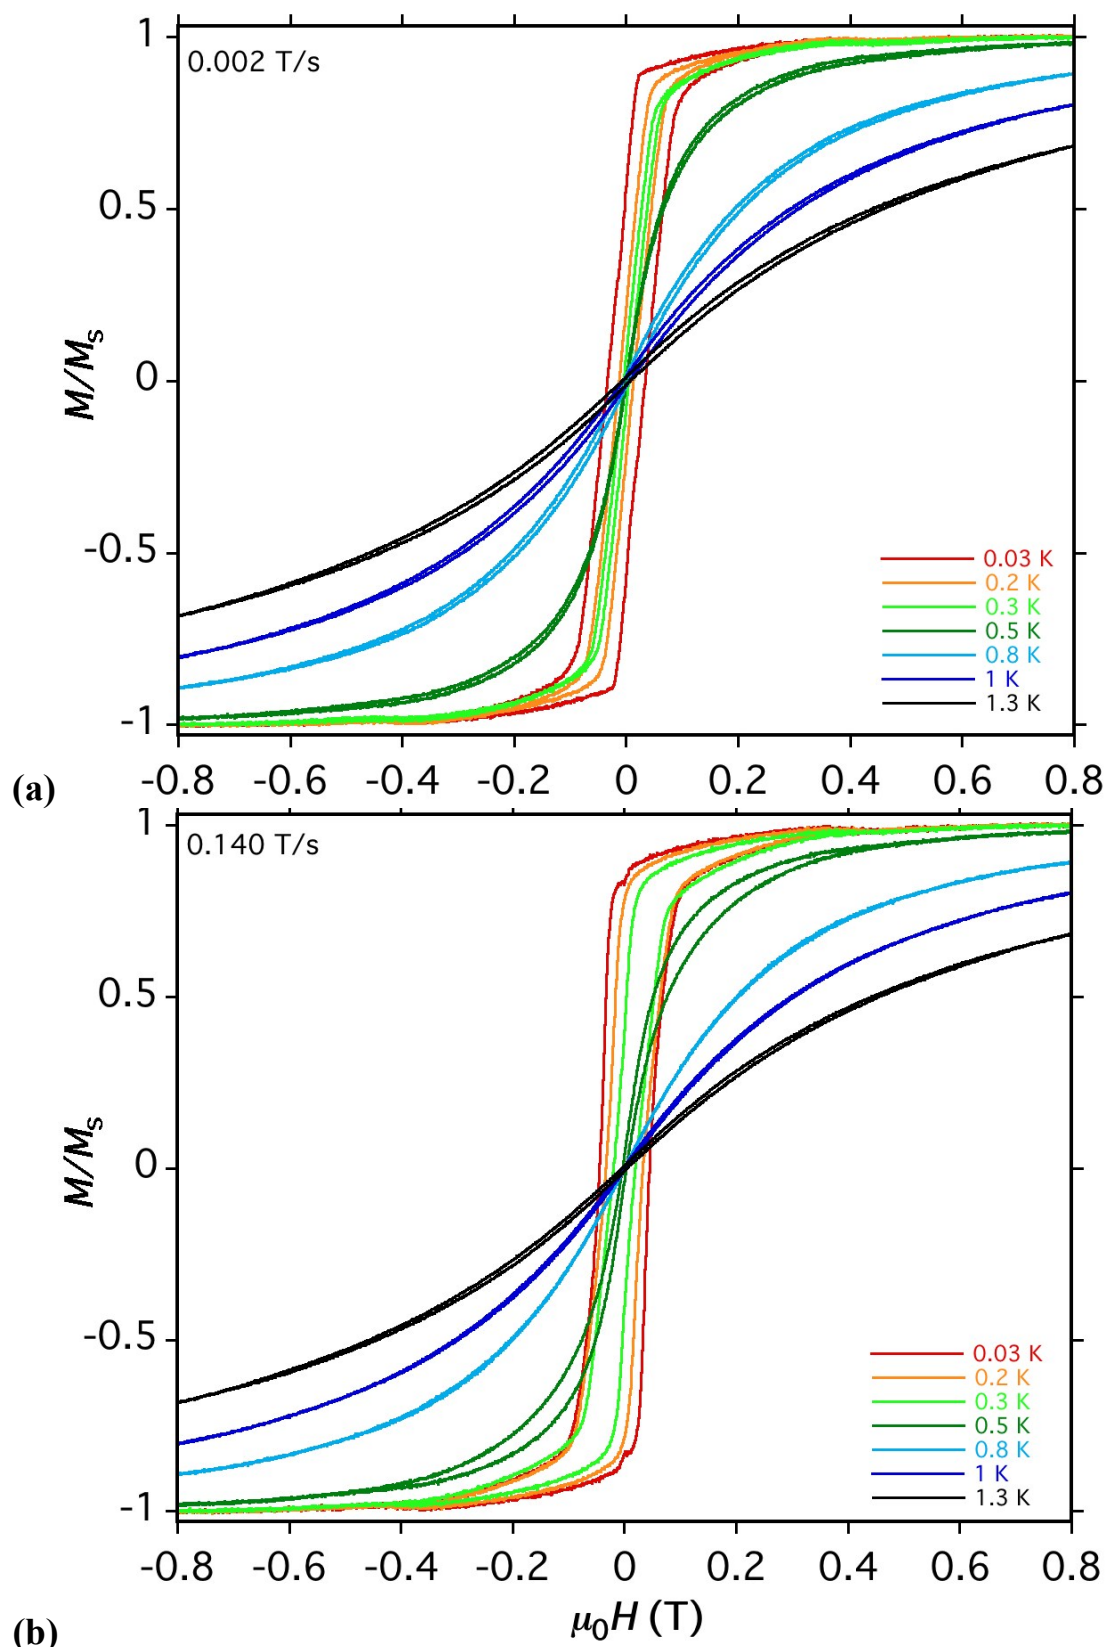

**Figure S17.** Field dependences of the normalized magnetization at the field sweeping rate of 0.002 T·s<sup>-1</sup> (a), and 0.140 T·s<sup>-1</sup> (b), measured at different temperatures on an oriented single crystal of **2** with the magnetic field applied along the easy magnetic axis.

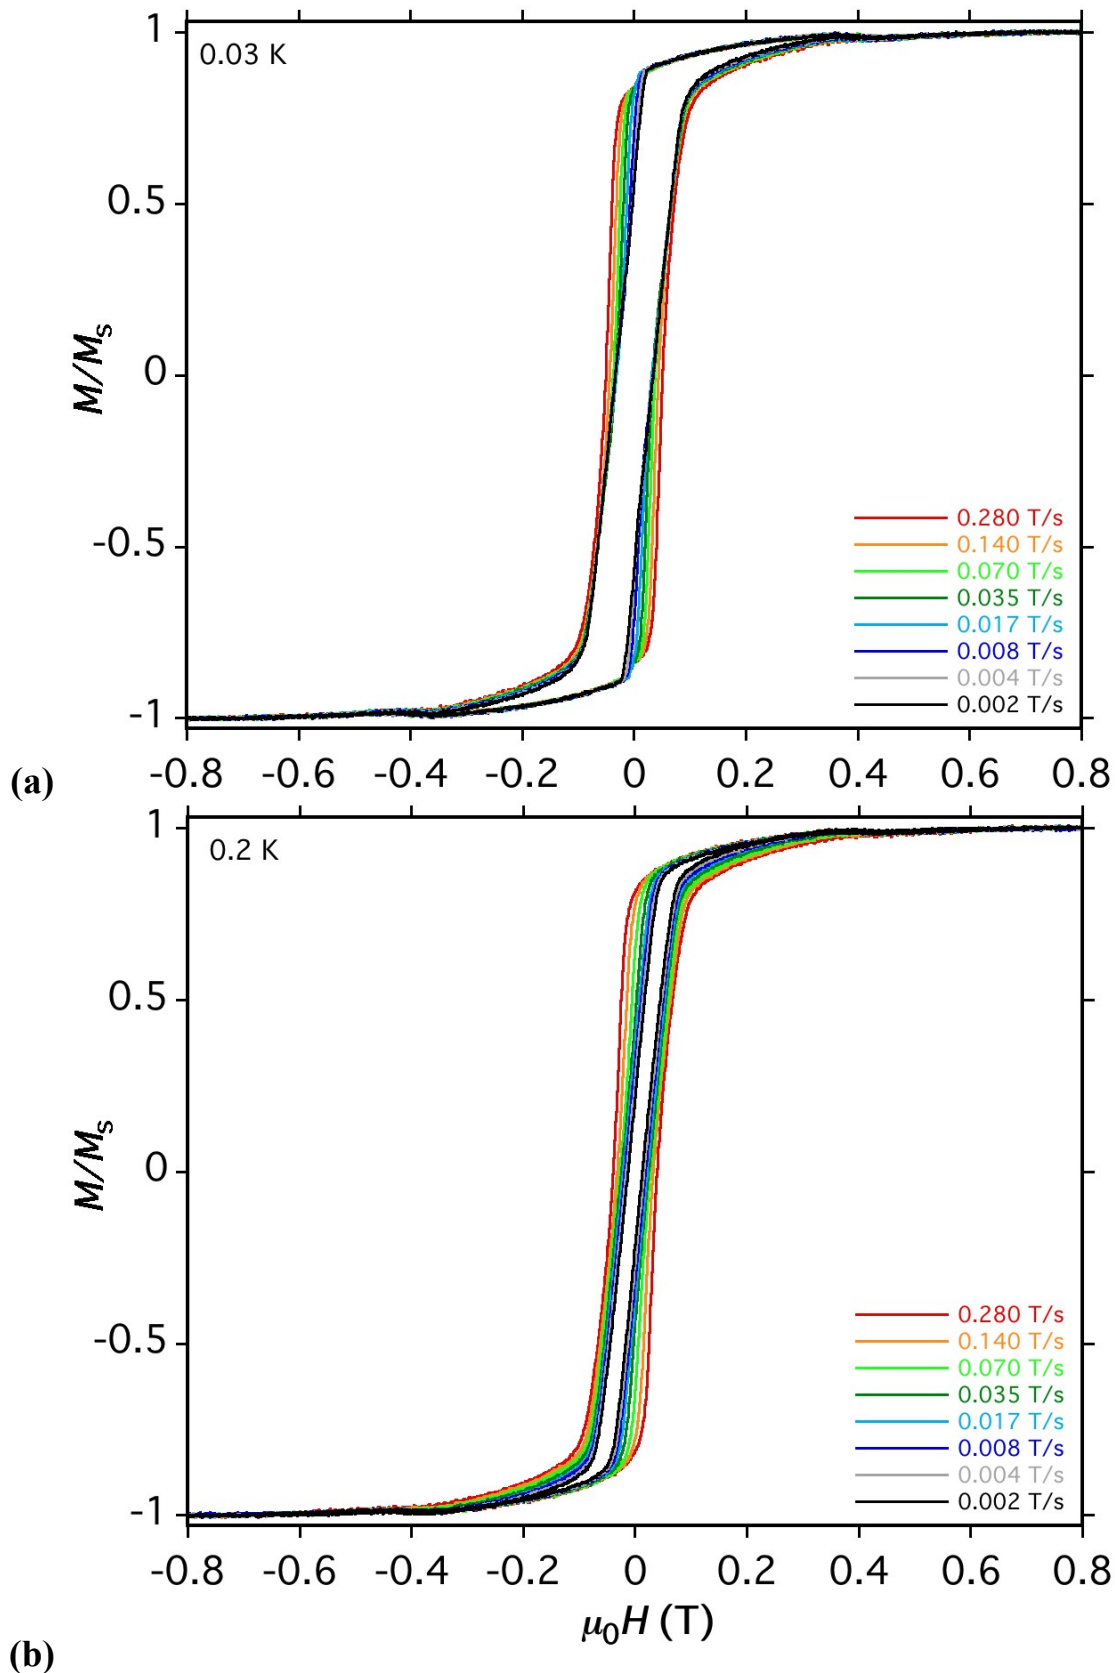

**Figure S18.** Field dependences of the normalized magnetization at 0.03 K (a), and 0.2 K (b) measured at different field sweeping rates on an oriented single crystal of **2** with the magnetic field applied along the easy magnetic axis. The maximum coercivity reaches 1043.5 Oe at 30 mK and SwRate of 0.280 T·s<sup>-1</sup>.
